# Supplementary material for: G0.5 PAMAM dendrimers improve the kinetic stabilization and nanoscale precipitation mechanism of amorphous calcium carbonate
Source: Royal Society of Chemistry journal article supplement (doi:10.1039/c7ra07169h), 2017-01-01
Supplement: c7ra07169h1.pdf [file c7ra07169h1.pdf]

## SUPPORTING INFORMATION

# **G0.5 PAMAM dendrimers improved kinetic stabilization and nanoscale precipitation mechanism of amorphous calcium carbonate**

Weiguang Shi,<sup>a</sup> Zaiqiang Ma,<sup>a</sup> Yuqiang Mu,<sup>a</sup> Jun Wang,<sup>\*,a</sup> Benxian Li,<sup>b</sup> Xiaofeng Wang,<sup>b</sup> Zhaogang Teng,<sup>c</sup> and Xiaoyang Liu<sup>\*,b</sup>

---

<sup>a</sup> Provincial Key Laboratory of Oil & Gas Chemical Technology, College of Chemistry & Chemical Engineering, Northeast Petroleum University, Daqing 163318, China.

<sup>b</sup> State Key Laboratory of Inorganic Synthesis and Preparative Chemistry, College of Chemistry, Jilin University, Changchun 130023, China.

---

<sup>c</sup> Department of Medical Imaging, Nanjing Hospital, Nanjing 210002, China.

†Corresponding Authors: Email: wangjun1965@yeah.net, liuxy@jlu.edu.cn

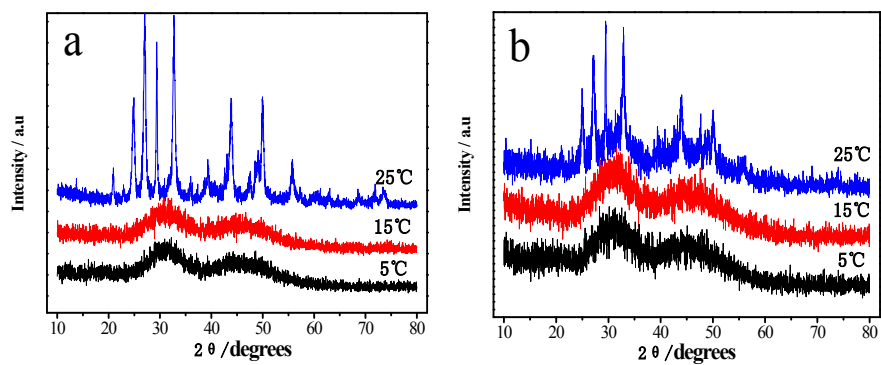

**Supporting Figure 1:** pXRD patterns of  $\text{CaCO}_3$  particles at different temperature. (a) without G0.5 at 120s and (b) with G0.5 at 300s.

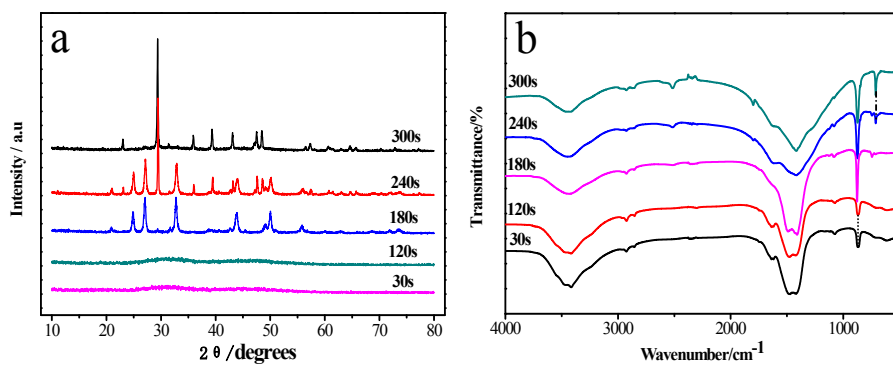

**Supporting Figure 2:** (a) pXRD patterns and (b) FTIR spectra of CaCO<sub>3</sub> particles in different time-scale without G0.5 at 15°C.

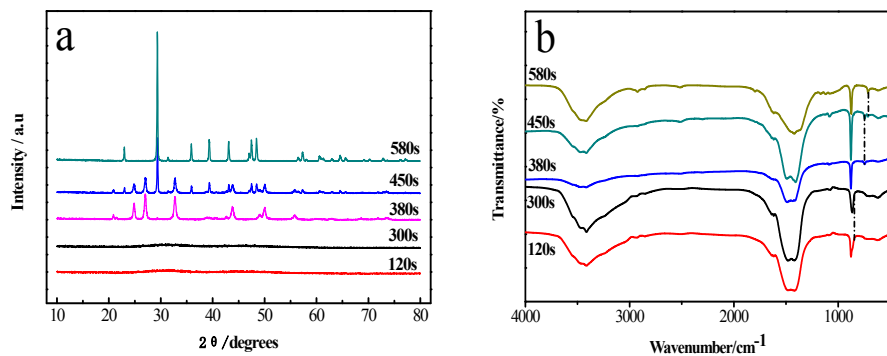

**Supporting Figure 3:** (a) pXRD patterns and (b) FTIR spectra of  $\text{CaCO}_3$  particles in different time-scale with 5000 mg/L G0.5 at  $15^\circ\text{C}$ .

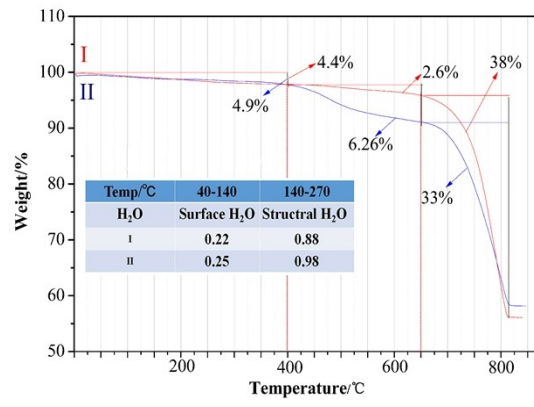

**Supporting Figure 4:** Thermogravimetric analysis (TGA) of ACC. (a) Control and (b) 5000 mg/L G0.5 at 15°C.

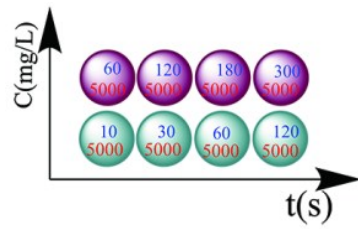

**Supporting Figure 5:** Schematic diagrams of the sample generation.

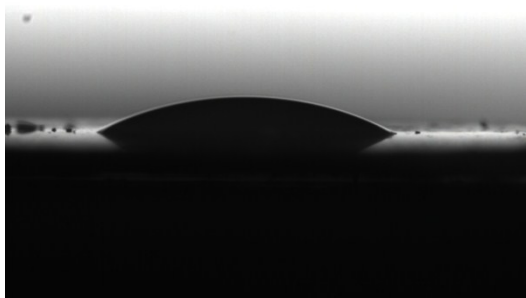

**Supporting Figure 6:** Contact angel of ACC generated at 15°C with 5000 mg/L G0.5.

The contact angel was 27.11° obtained by hypsometry method.

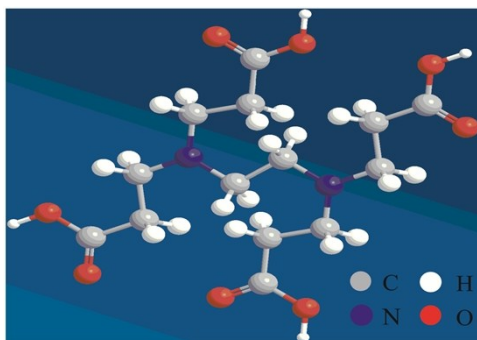

**Supporting Figure7:** Schematic diagram for carboxylic-terminated G0.5 PAMAM dendrimers molecular structure.
